# Supplementary material for: FeCl3 promoted highly regioselective [3 + 2] cycloaddition of dimethyl 2-vinyl and aryl cyclopropane-1,1-dicarboxylates with aryl isothiocyanates
Source: Royal Society of Chemistry journal article supplement (doi:10.1039/c2ob25682g), 2012-01-01

## ***Supporting Information***

# **FeCl<sub>3</sub> Promoted Highly Regioselective [3+2] Cycloaddition of Dimethyl 2-Vinyl and Aryl Cyclopropane-1,1-dicarboxylates with Aryl Isothiocyanates**

**Huina Wang,<sup>a</sup> Wei Yang,<sup>a</sup> Hong Liu,<sup>a</sup> Wei Wang,<sup>a,b\*</sup> and Hao Li<sup>a,b\*</sup>**

<sup>a</sup> *Shanghai Institute of Materia Medica, Chinese Academy of Sciences, Shanghai 201203, P. R. China*

<sup>b</sup> *School of Pharmacy, East China University of Science & Technology, 130 Meilong Road, Shanghai 200237, P. R. China*

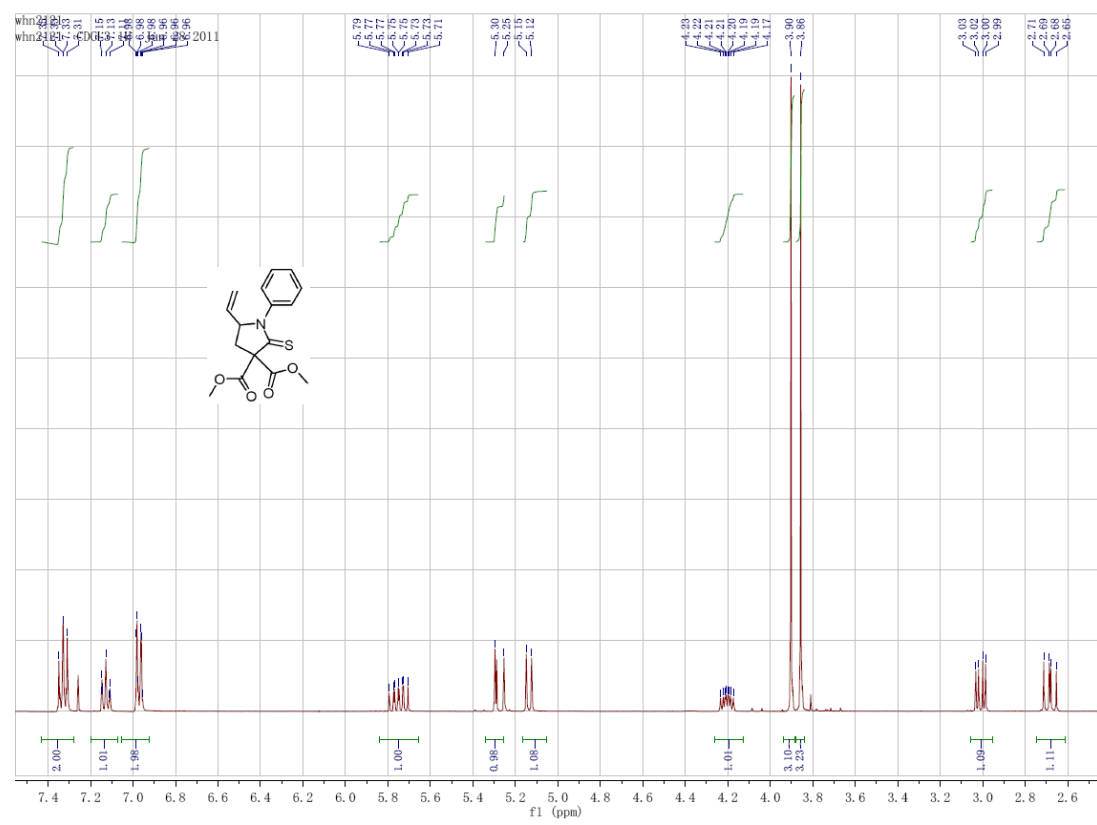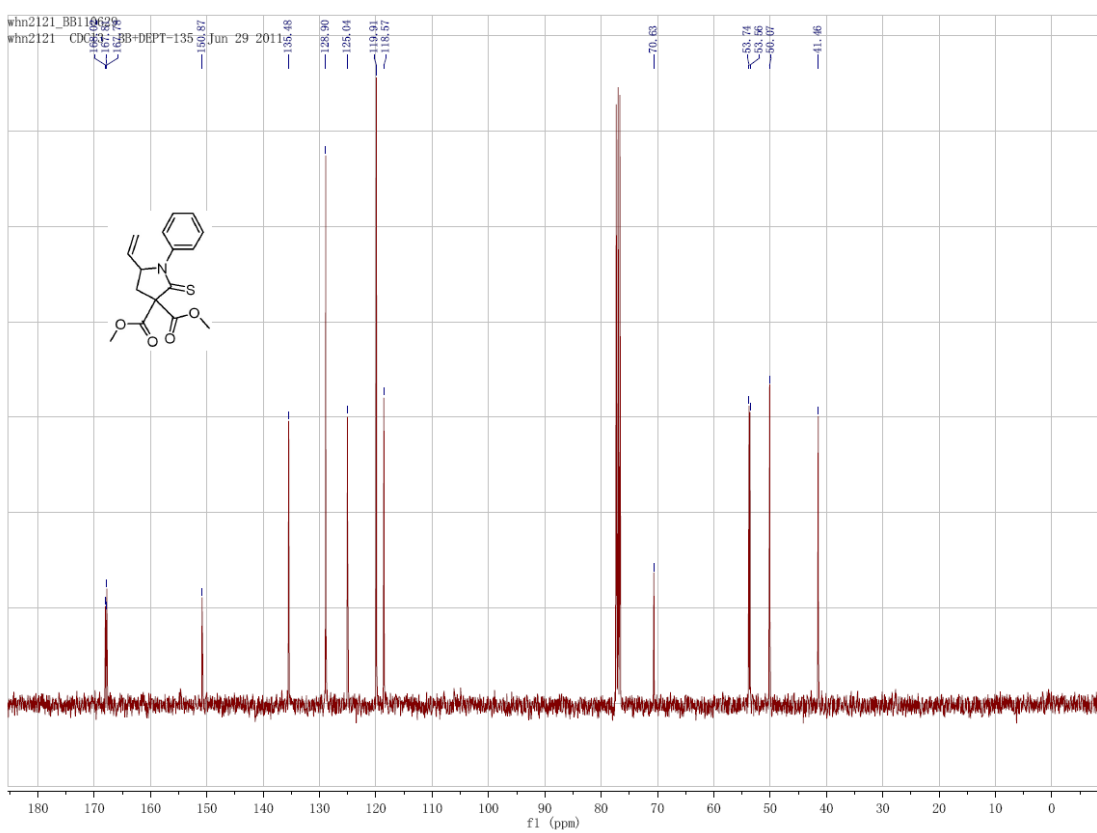

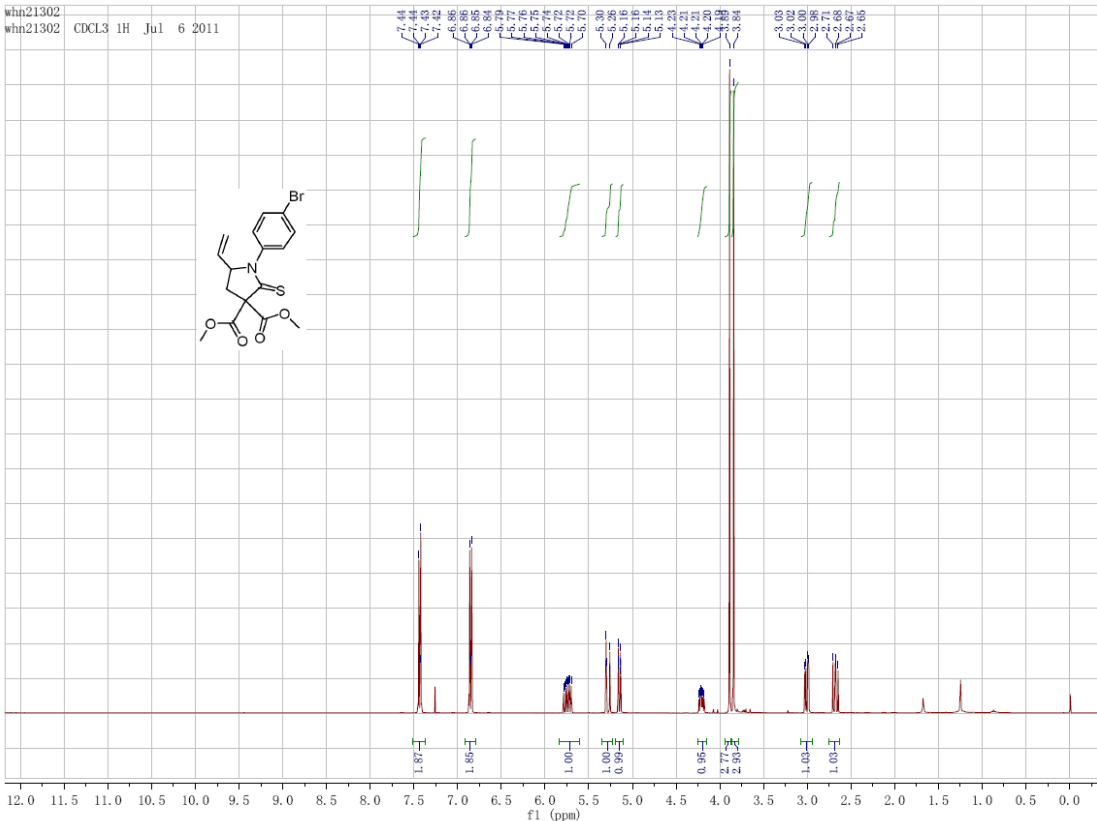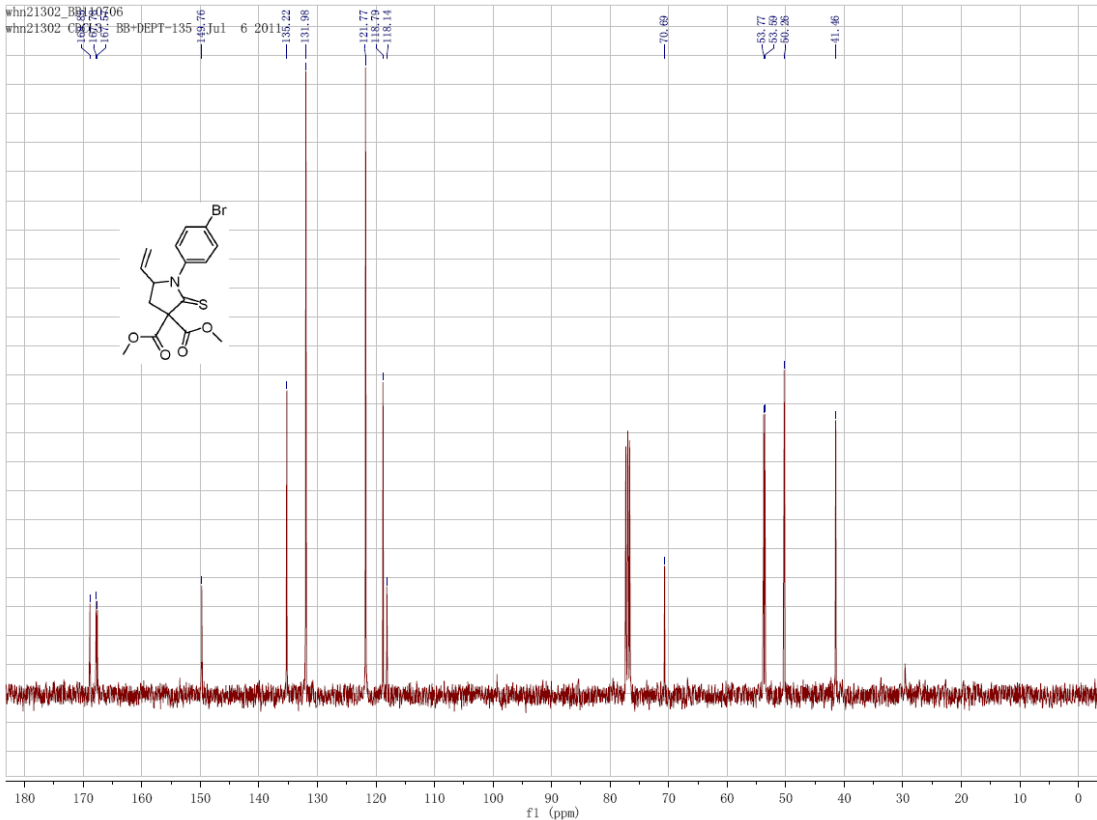

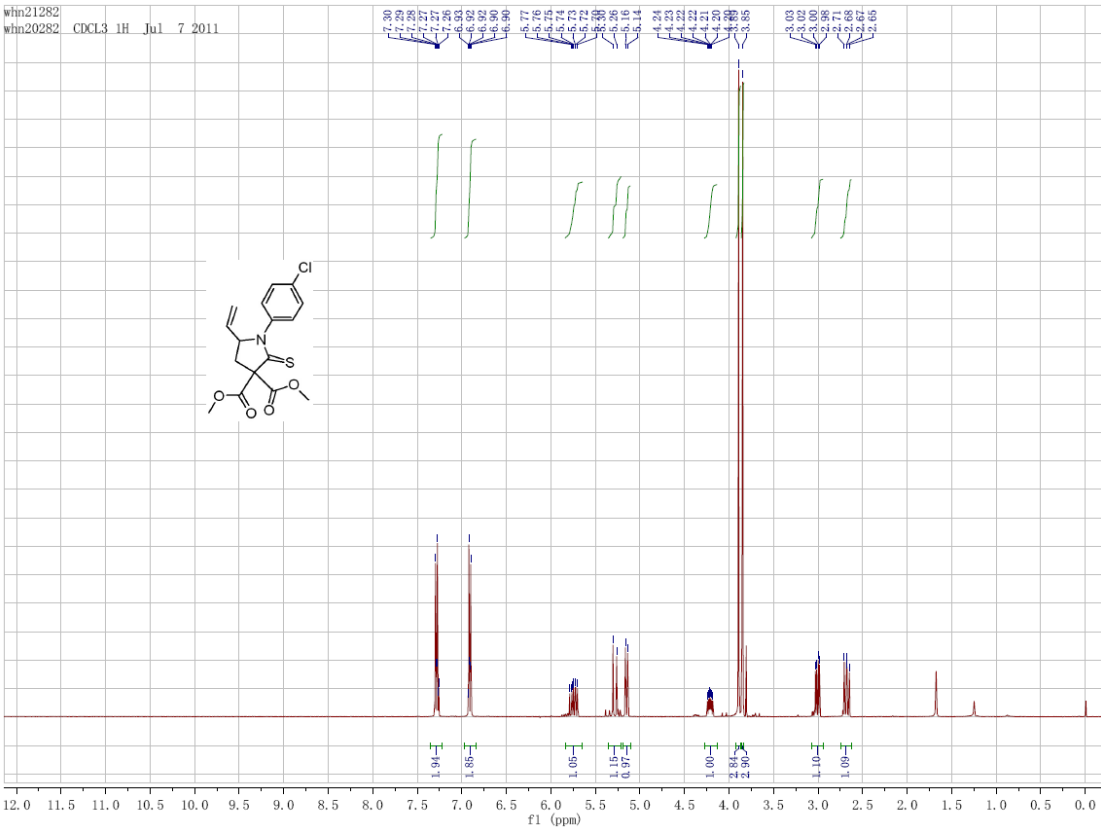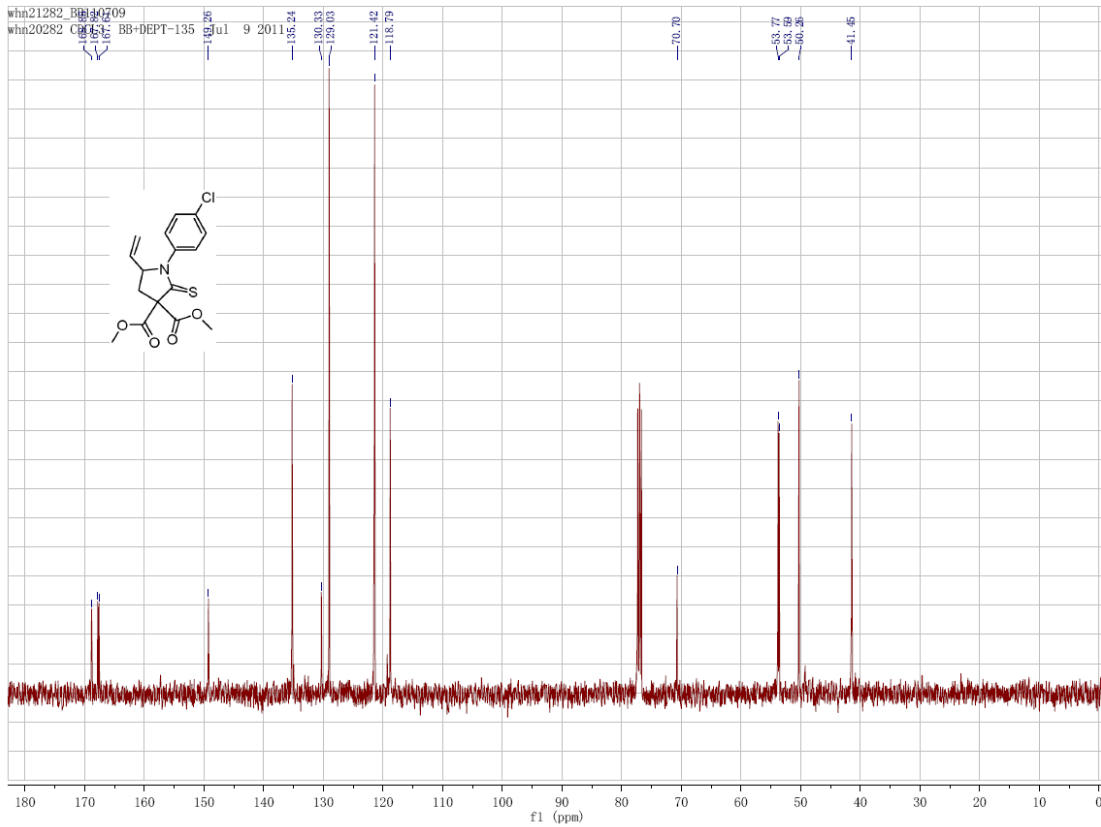

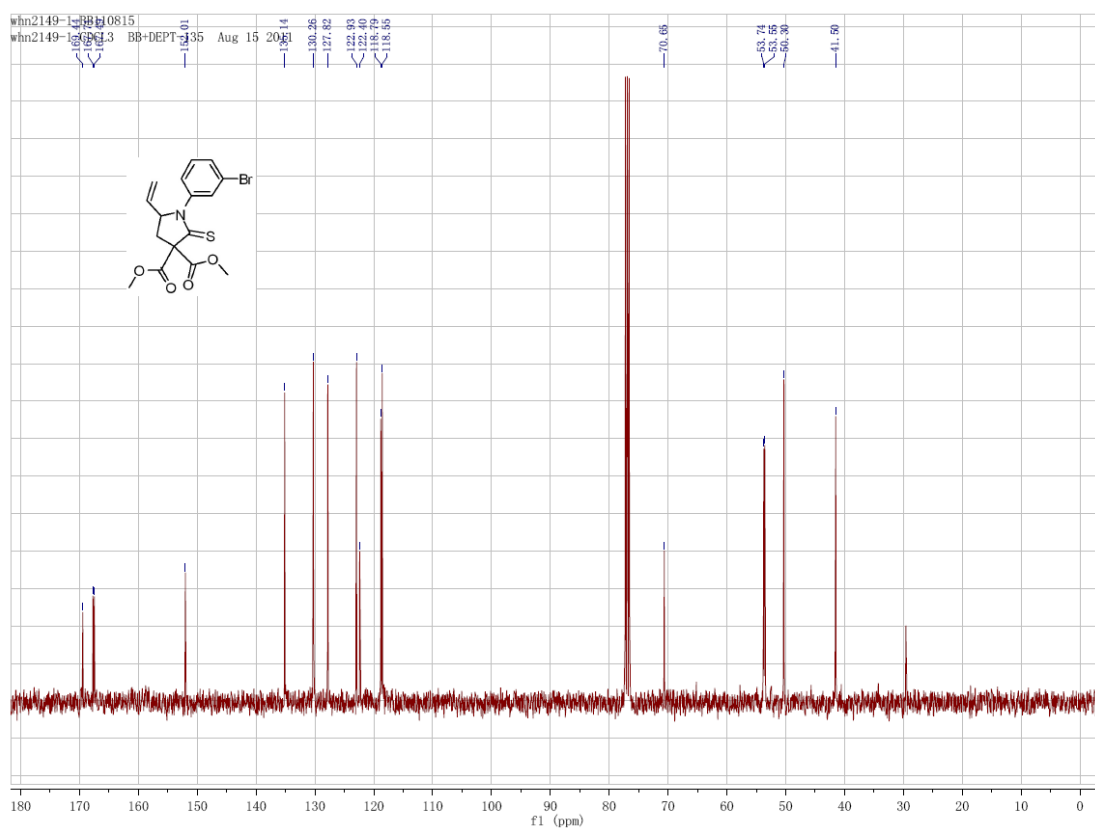

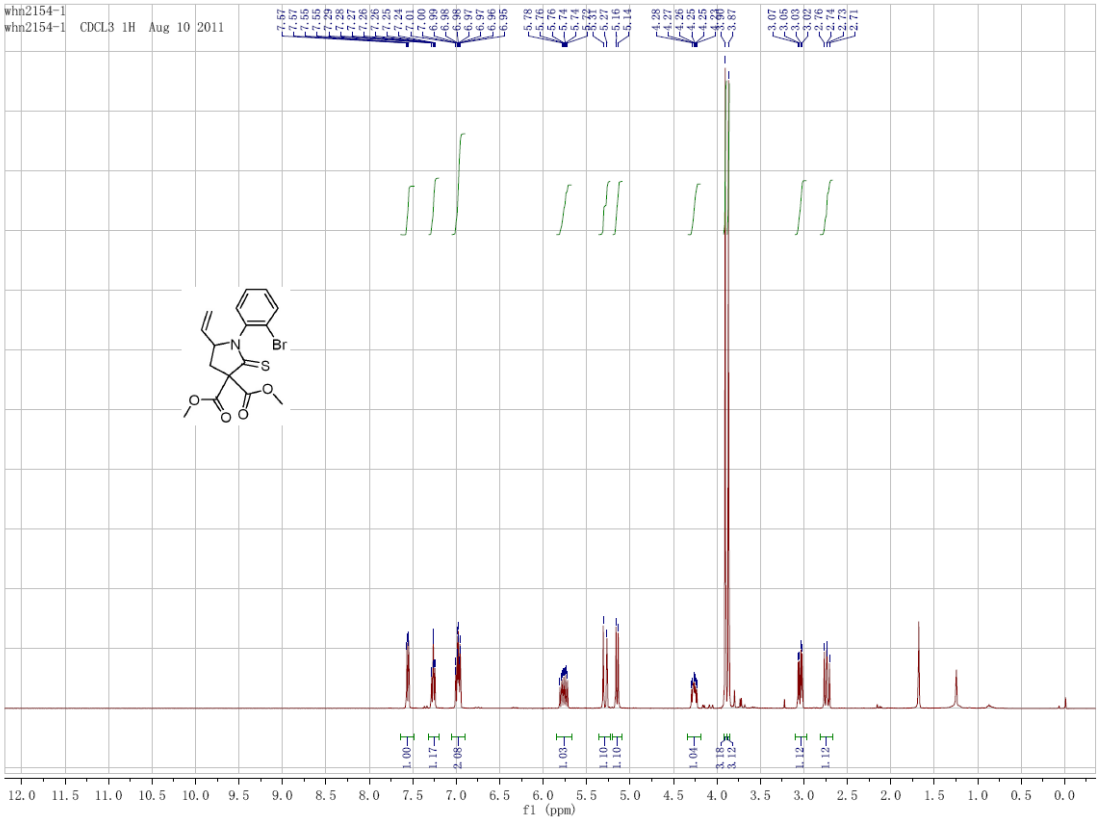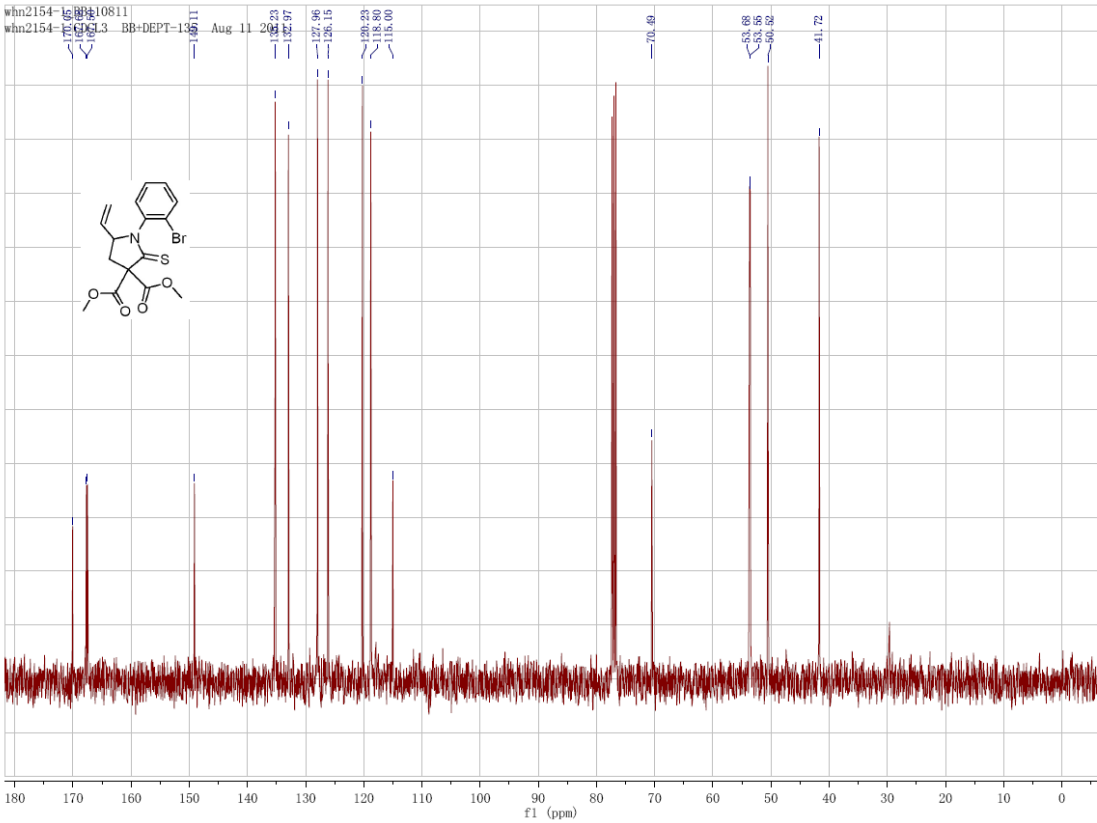

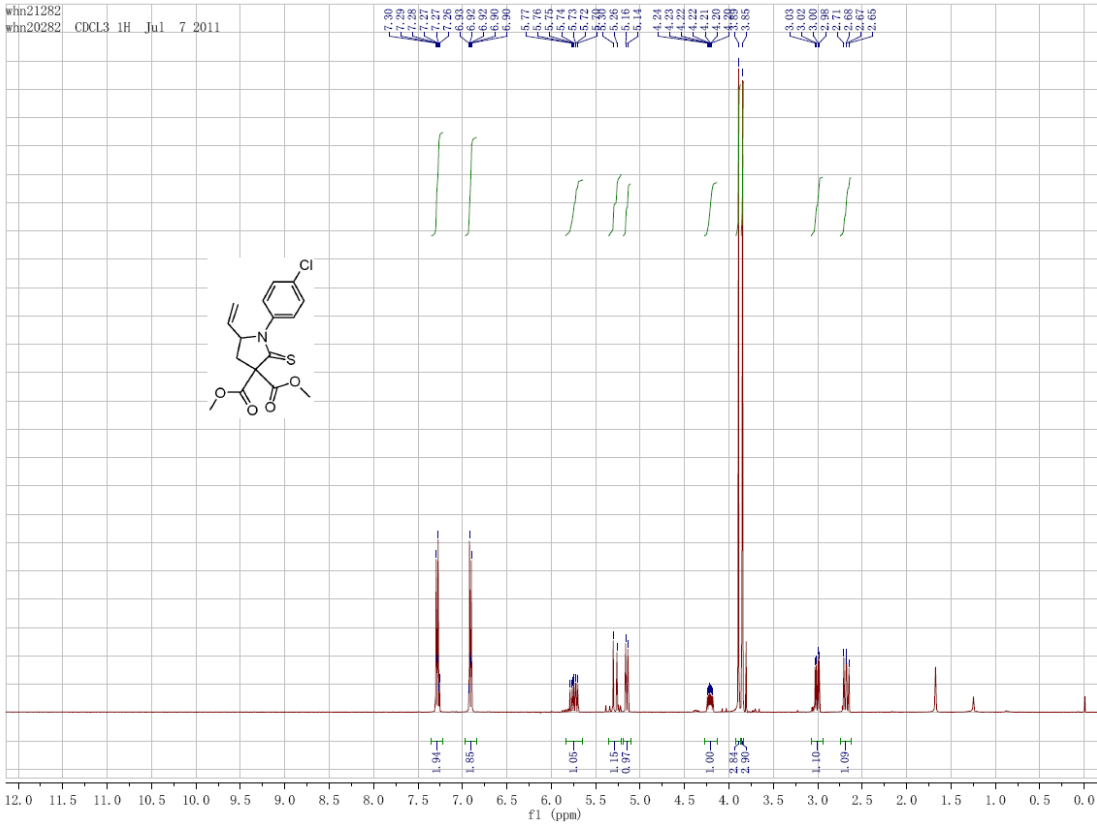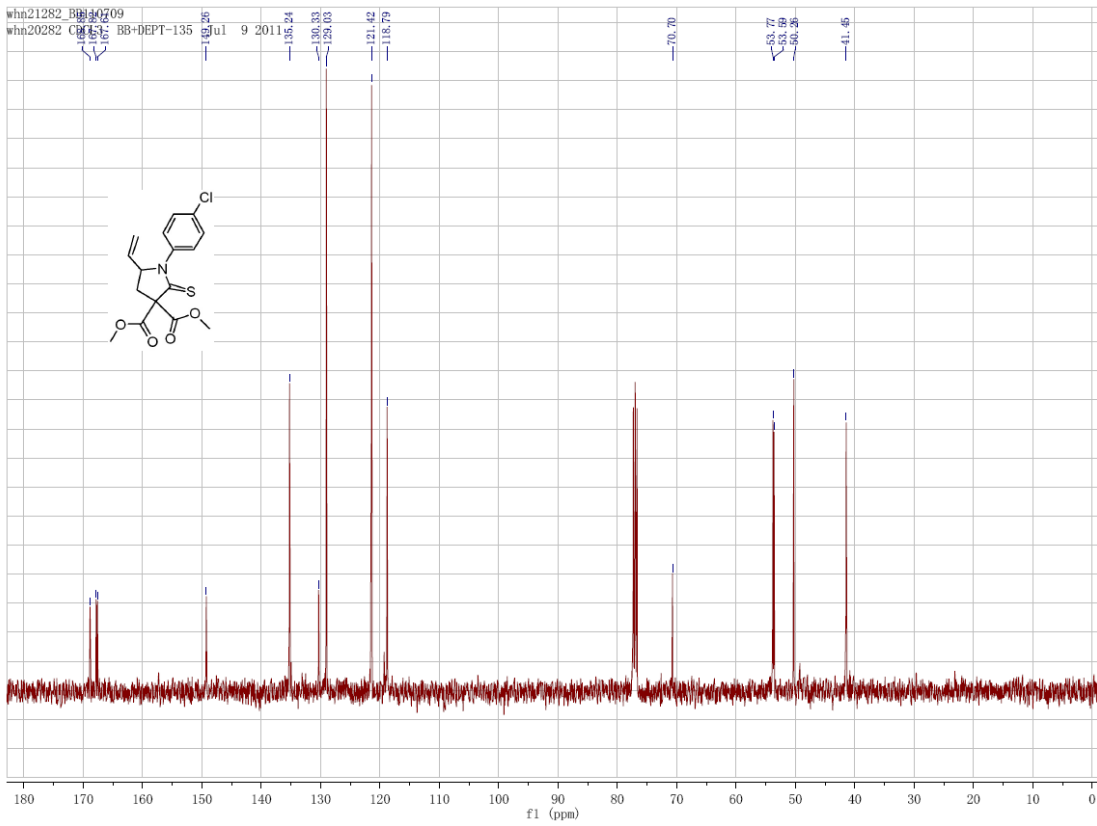

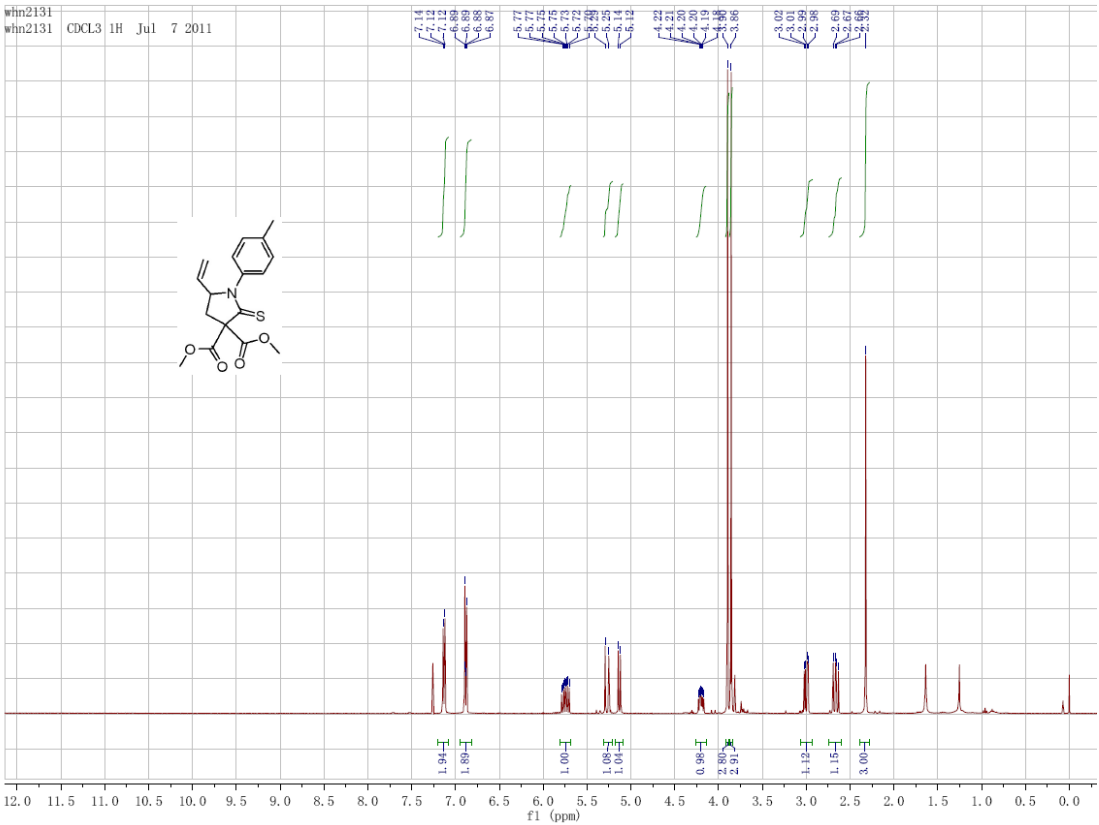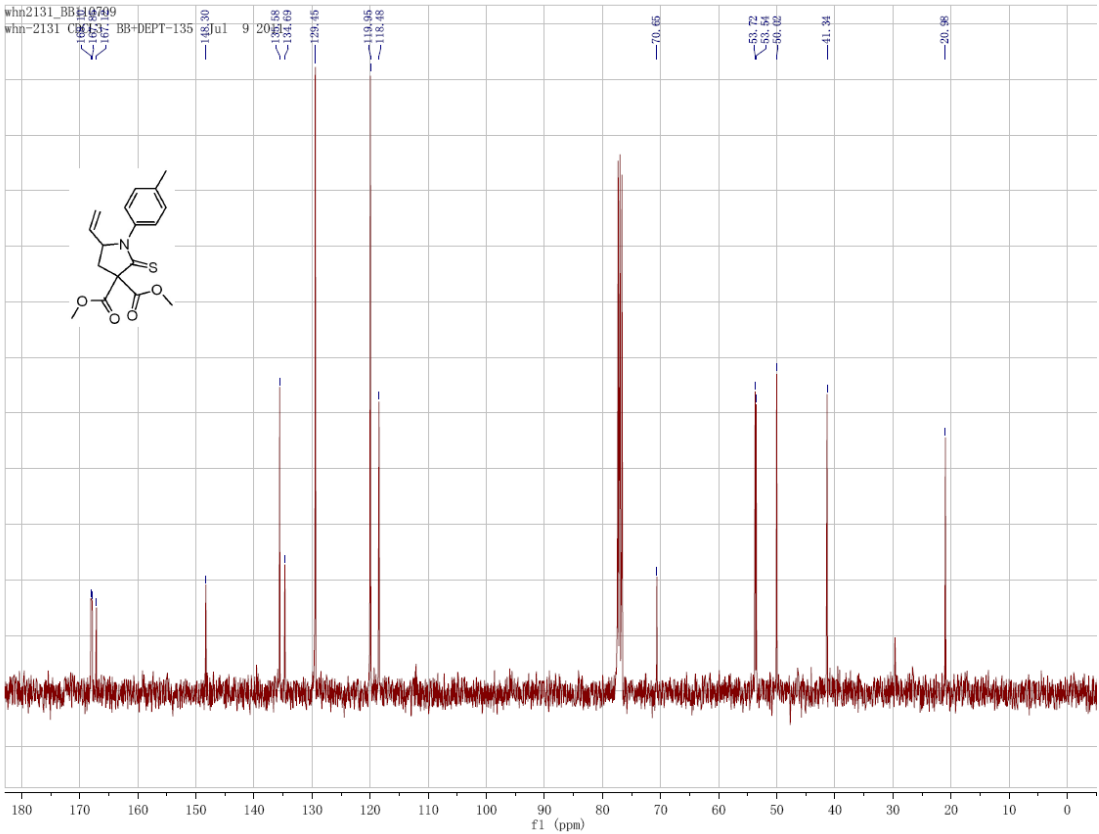



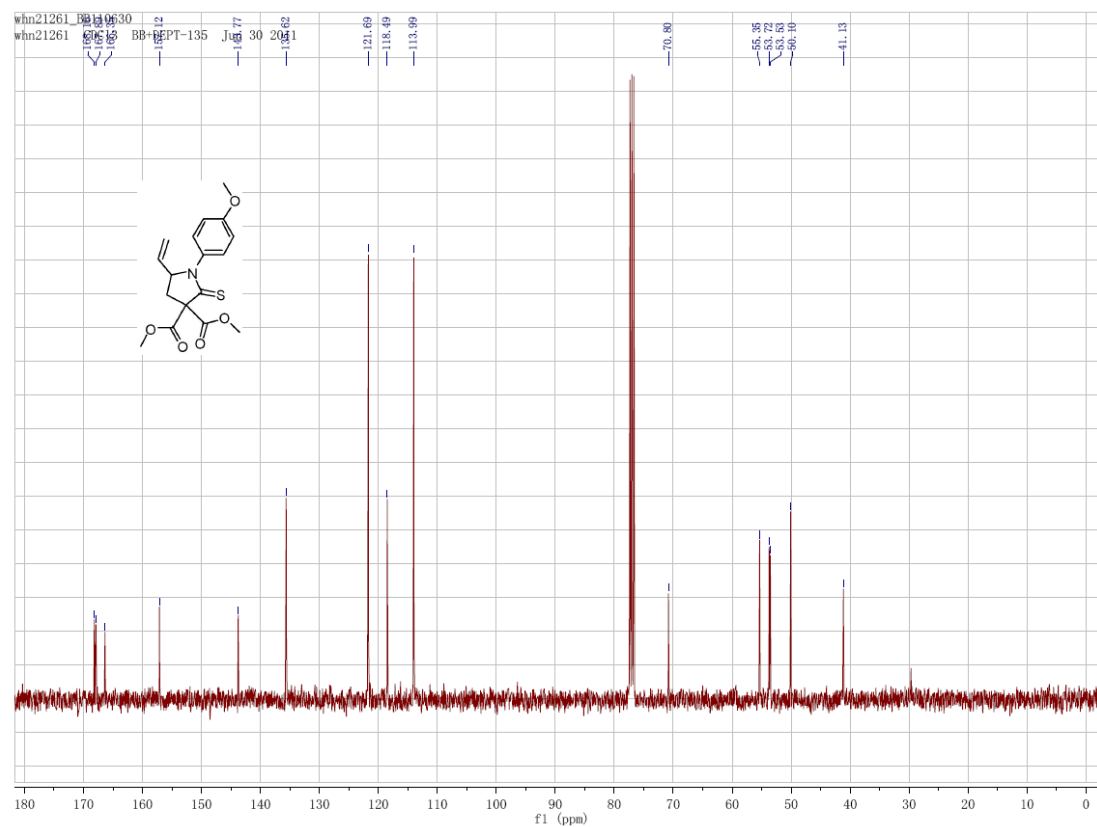

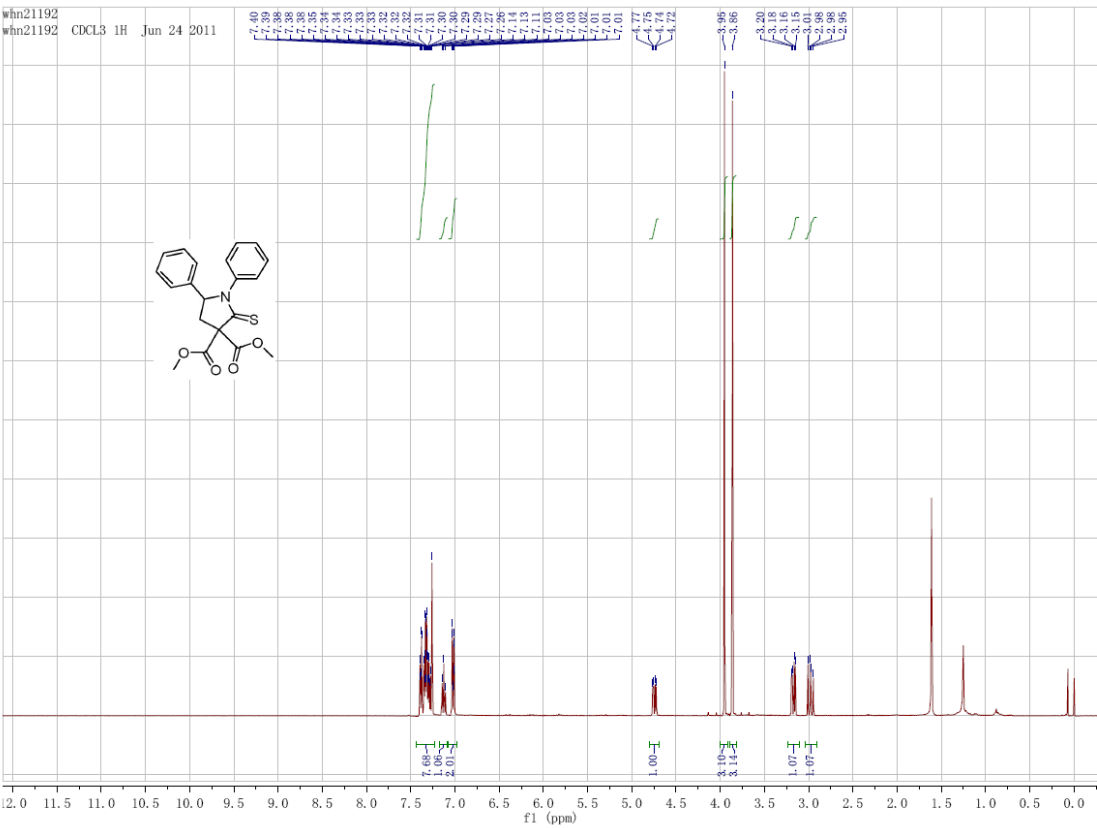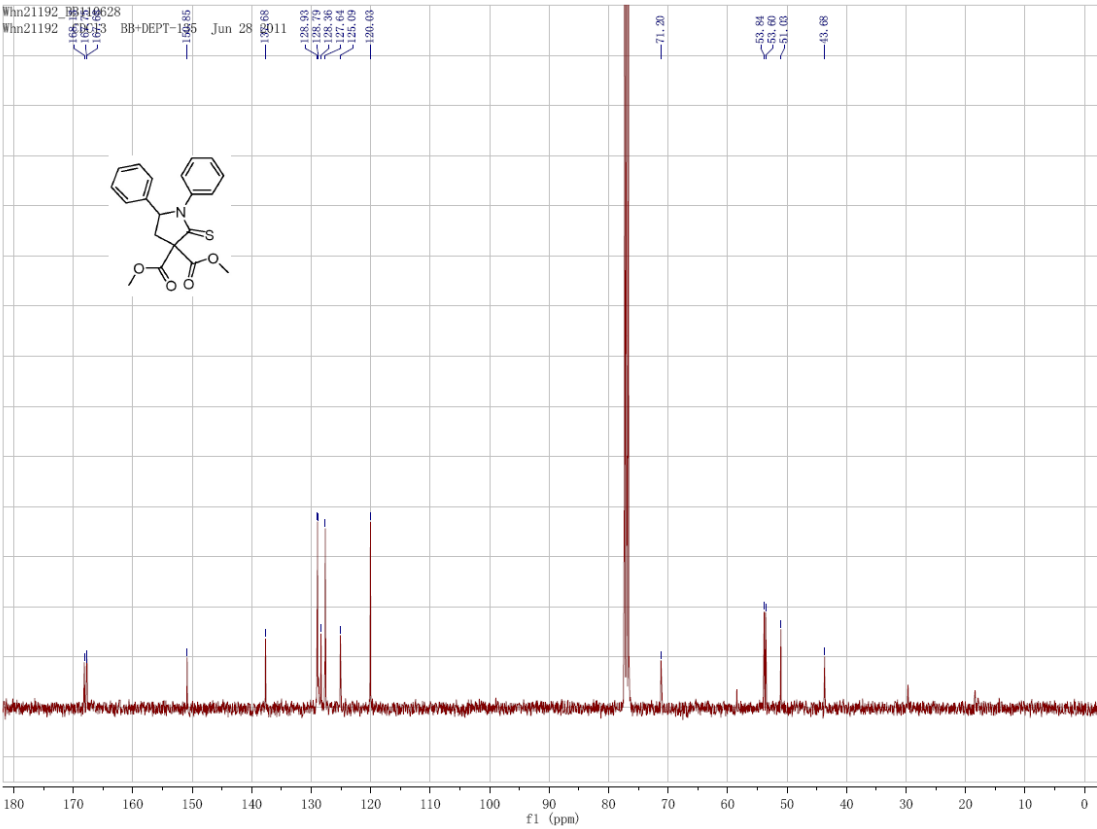

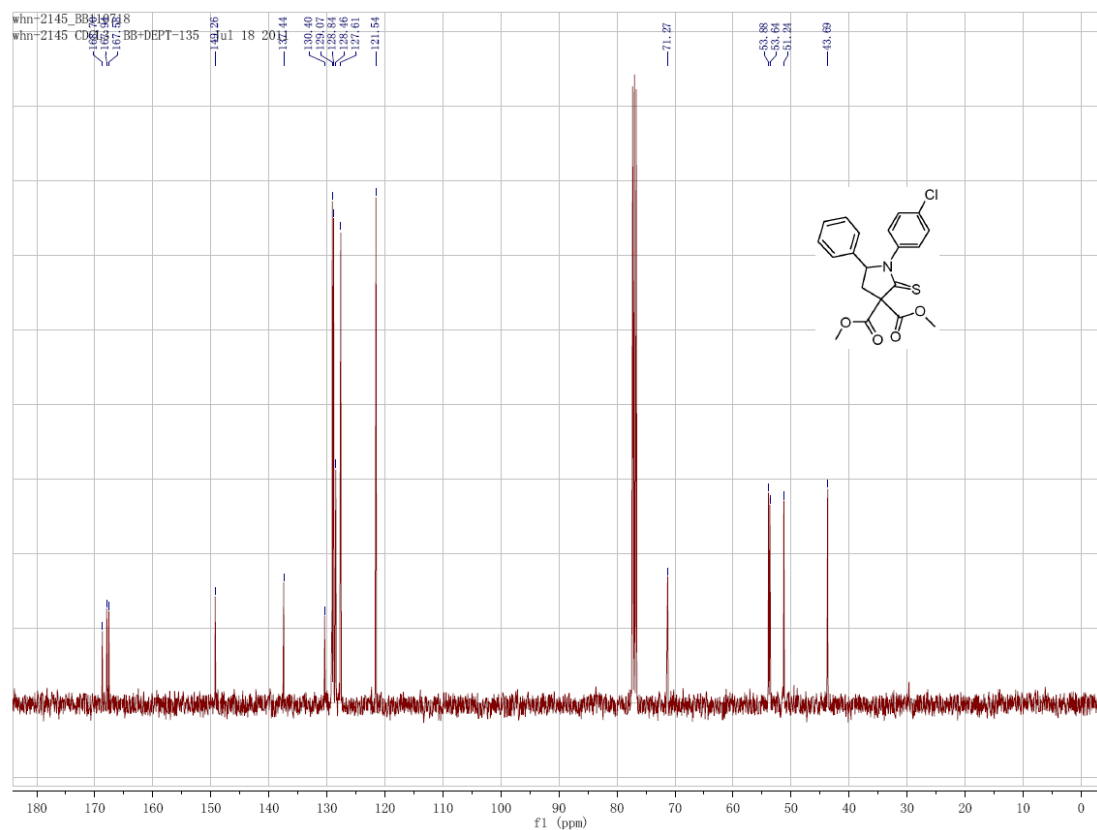

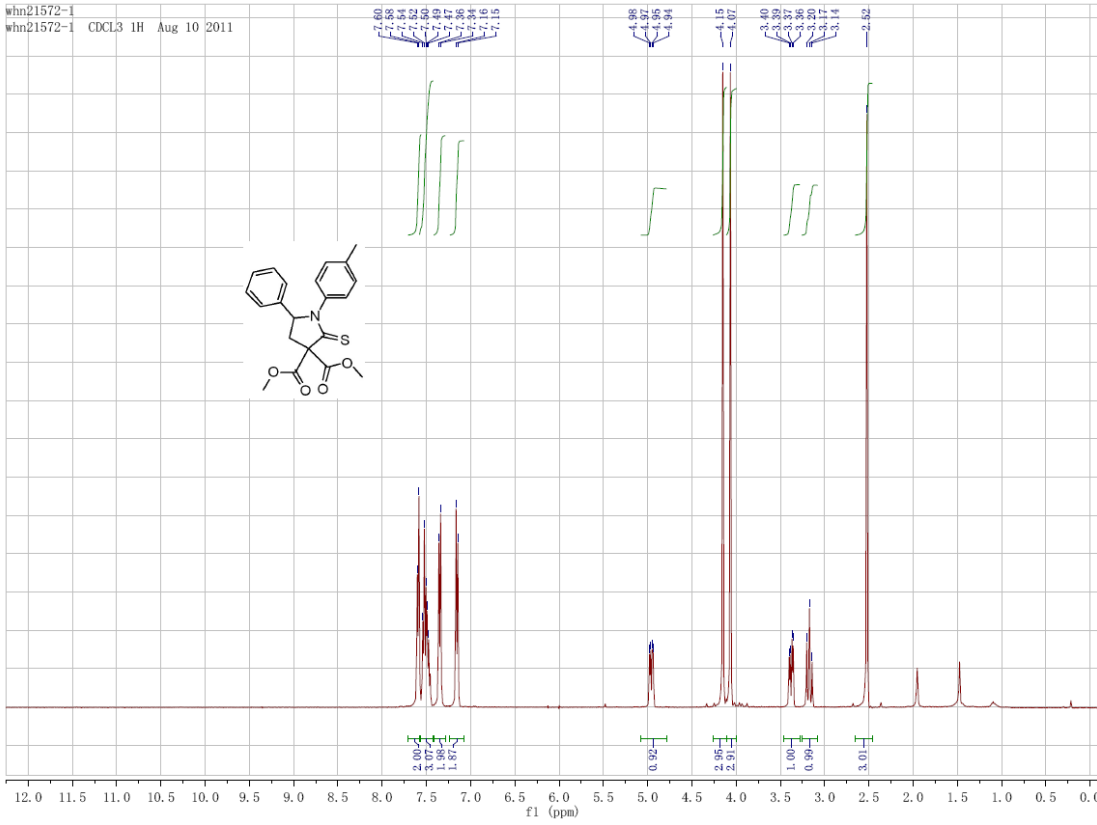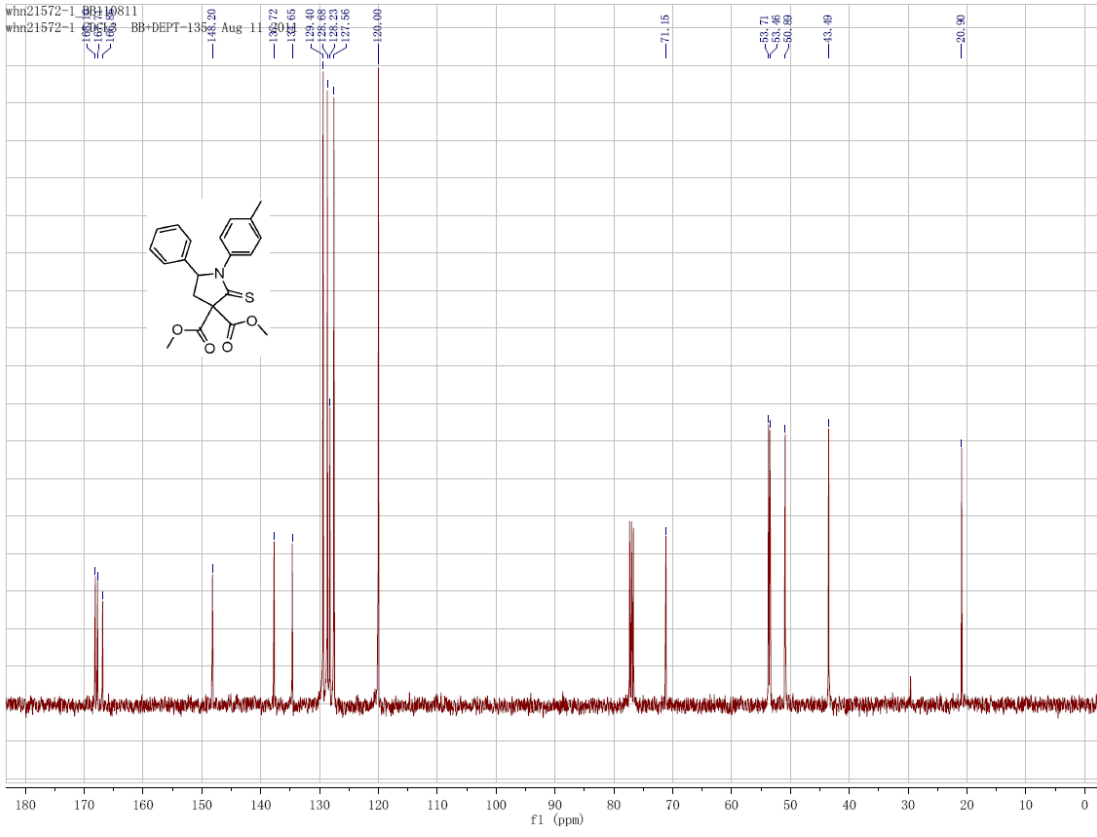

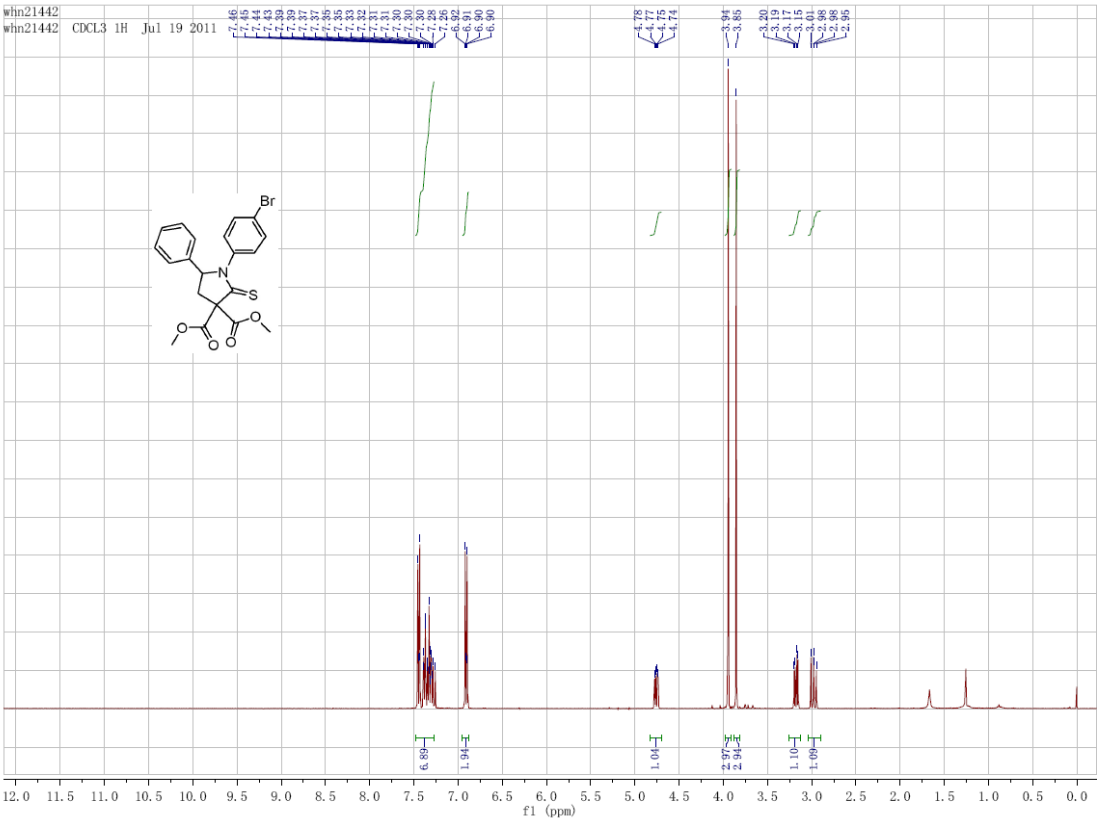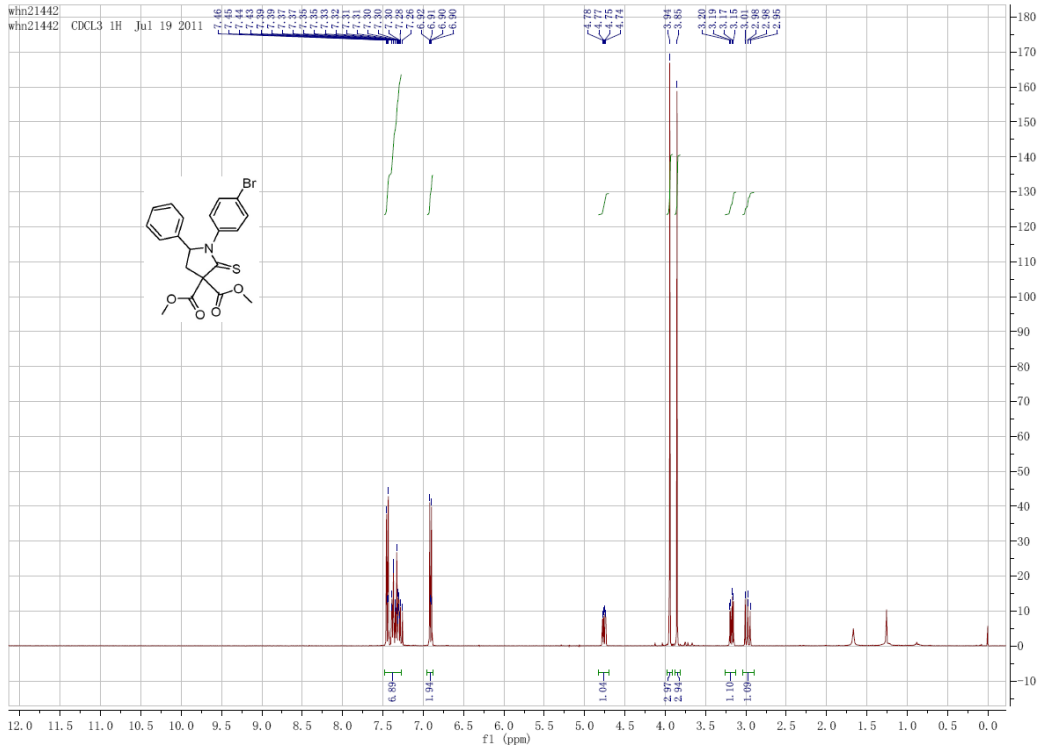

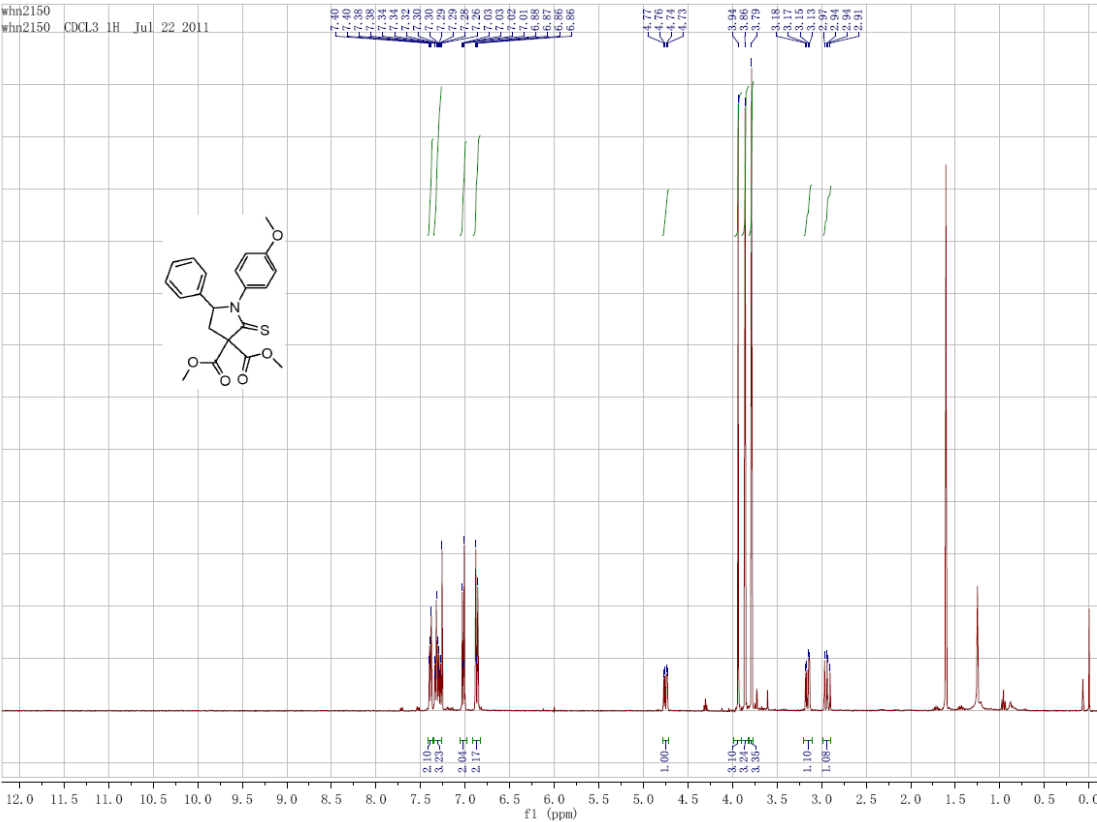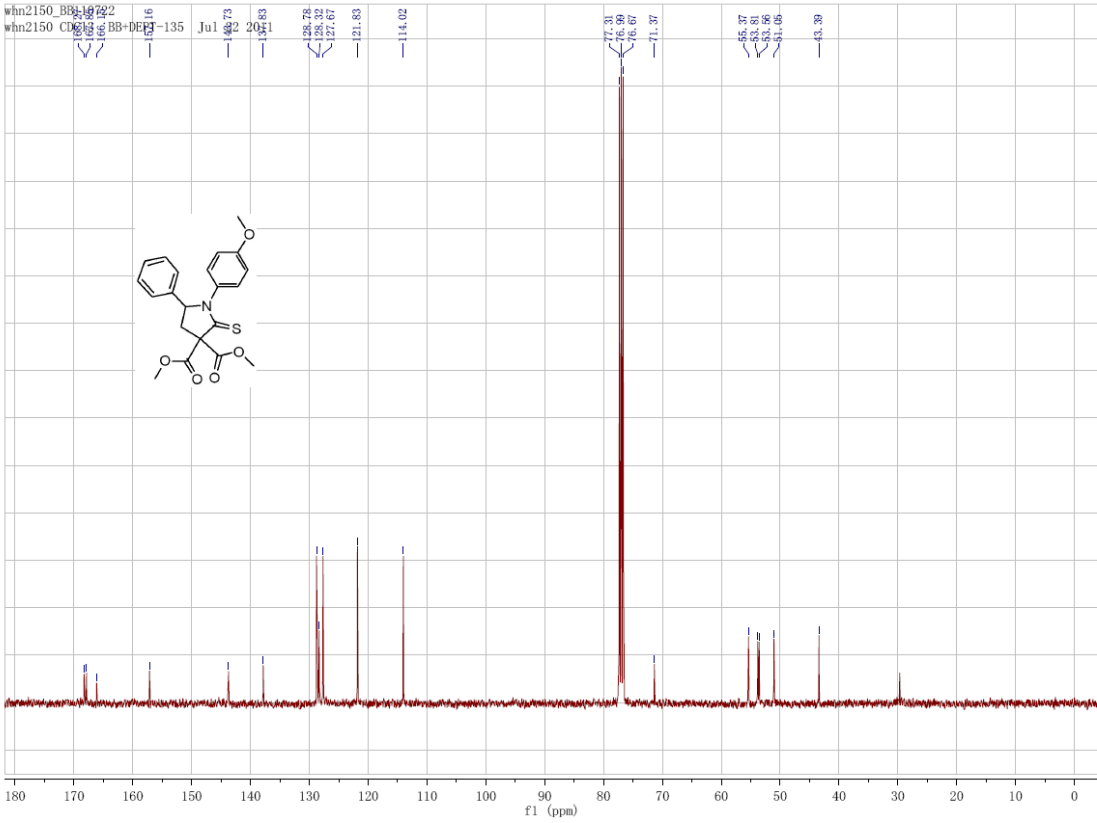

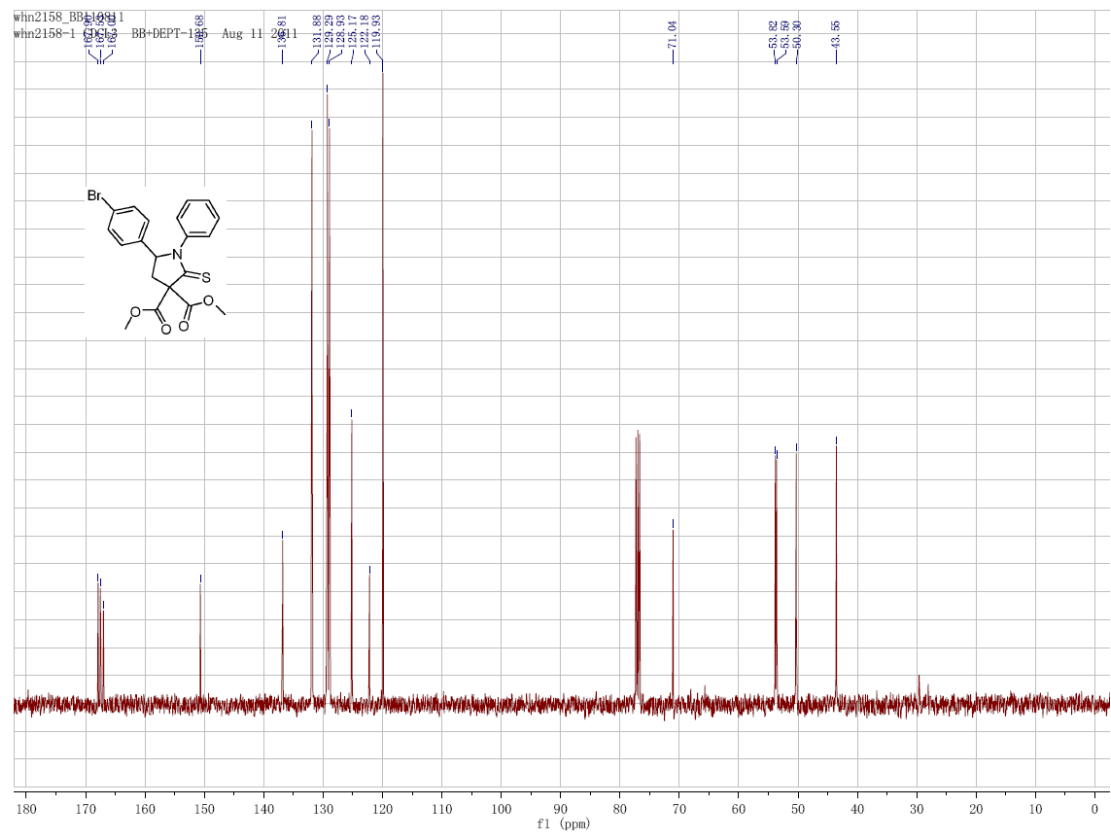

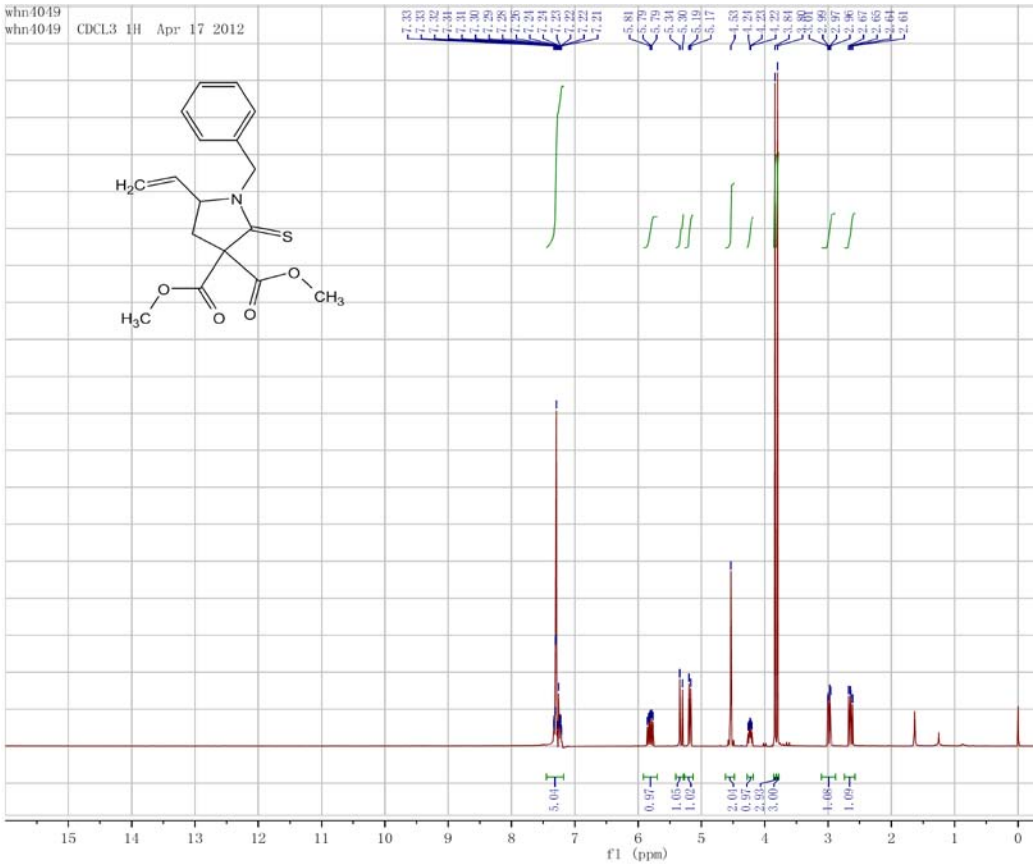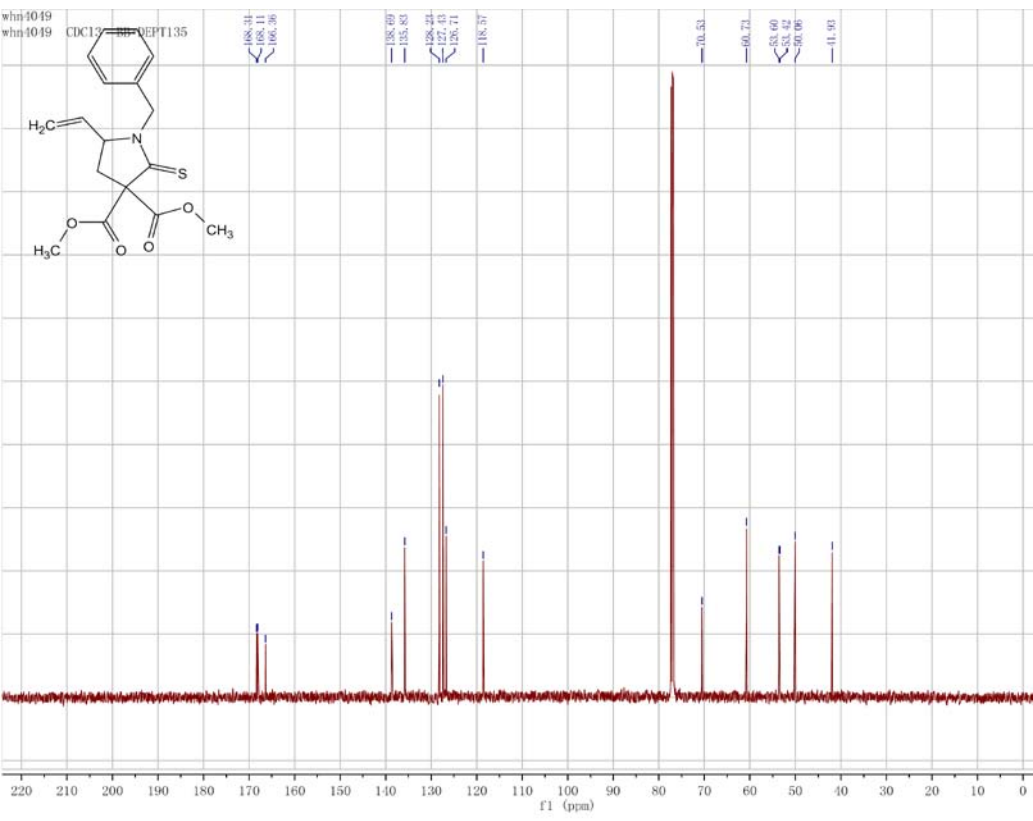

Supplement: c2ob25682g.pdf [file c2ob25682g.pdf]
